# Supplementary material for: ER targeting of non-imported mitochondrial carrier proteins is dependent on the GET pathway
Source: Life Sci Alliance. 2021 Jan 21;4(3):e202000918. doi: 10.26508/lsa.202000918 (PMC7898604; doi:10.26508/lsa.202000918)
Supplement: Supplementary file 1 [file LSA-2020-00918_TableS1.xlsx]

## Sheet: Sheet1
Table S1. Antibodies, plasmids and chemicals used in this study
Reagent or Resource	Source	Identifier
Antibodies
DYKDDDDK Tag Polyclonal Antibody	Invitrogen	Cat # PA1-984B
		RRID: AB_347227
Anti-GFP from mouse IgG1κ	Sigma-Aldrich	Cat # 11814460001 RRID: AB_390913
Monoclonal ANTI-FLAG® M2 antibody produced in mouse	Sigma-Aldrich	Cat # F1804
		RRID: AB_262044
Peroxidase AffiniPure Donkey Anti-Mouse IgG (H+L)	Jackson Immunoresearch	Cat # 715-035-150
		RRID: AB_2340770
Peroxidase AffiniPure Donkey Anti-Rabbit IgG (H+L)	Jackson Immunoresearch	Cat # 711-005-152
		RRID: AB_2340585
Goat anti-Mouse IgG (H+L) Cross-Adsorbed Secondary Antibody, Alexa Fluor 488	Invitrogen	Cat # A-11001
		RRID: AB_2534069
Chemicals
Carbonyl cyanide 4-(trifluoromethoxy)phenylhydrazone (FCCP)	Sigma-Aldrich	Cat # C2920; CAS # 370-86-5
Cycloheximide	Sigma-Aldrich	Cat # C1988; CAS # 66-81-9
cOmplete Protease Inhibitor Cocktail	Sigma-Aldrich	Cat # 11697498001
Phenylmethylsulfonyl fluoride	Sigma-Aldrich	Cat # P7626; CAS # 329-98-6
IGEPAL®	Sigma-Aldrich	Cat # CA-630; CAS # 9002-93-1
Zymolyase 100T	US Biological Life Sciences	Cat # Z1004; CAS # 37340-57-1
Triton X-100	Bio-Rad	Cat # 1610407; CAS # 9002-93-1
Formaldehyde 16% in aqueous solution, EM Grade	VWR	Cat # 100503-914; CAS # 50-00-0
DTT (Dithiothreitol) (> 99% pure) Protease free	GOLDBIO	Cat # DTT10; CAS # 27565-41-9 / 3483-12-3
Critical Commercial Assays
Gateway LR Clonase II Enzyme Mix	Thermo Fisher	Cat # 11791020
Recombinant DNA
Plasmid: pAG413GPD-EGFP-SED5	This study	N/A
Plasmid: pAG413GPD-EGFP-YSY6	This study	N/A
