# Supplementary material for: ER targeting of non-imported mitochondrial carrier proteins is dependent on the GET pathway
Source: Life Sci Alliance. 2021 Jan 21;4(3):e202000918. doi: 10.26508/lsa.202000918 (PMC7898604; doi:10.26508/lsa.202000918)
Supplement: Supplementary file 3 [file LSA-2020-00918_TableS3.xlsx]

## Sheet: Sheet1
Table S3. Oligos used in this study
Name	Number	Sequence
Tagging Primers
ALO1 pKT Tag F	556	TATCATAAATGGTATTATAGATCCTAGTGAGTTGTCCGACGGTGACGGTGCTGGTTTA
ALO1 pKT Tag R	557	TTTTTTAGTAAAATATAGAGATTATTGAGACAAAAAGAGATCGATGAATTCGAGCTCG
TOM70 pKT Tag F	797	TCAAGAAACTTTAGCTAAATTACGCGAACAGGGTTTAATGGGTGACGGTGCTGGTTTA
TOM70 pKT Tag R	798	TTTGTCTTCTCCTAAAAGTTTTTAAGTTTATGTTTACTGTTCGATGAATTCGAGCTCG
TOM70 Longtine Tag F	1077	TCAAGAAACTTTAGCTAAATTACGCGAACAGGGTTTAATGCGGATCCCCGGGTTAATTAA
TOM70 Longtine Tag R	1078	TTTGTCTTCTCCTAAAAGTTTTTAAGTTTATGTTTACTGTGAATTCGAGCTCGTTTAAAC
MIR1 pKT Tag F	1156	GGGTTGCCCACCAACCATTGAAATTGGTGGTGGTGGTCATGGTGACGGTGCTGGTTTA
MIR1 pKT Tag R	1157	GAGGAGAGAATATATATGCATGTATCAATCAAGACCATTTTCGATGAATTCGAGCTCG
OM45 pKT Tag F	1858	TGATAAGGGTGATGGTAAATTCTGGAGCTCGAAAAAGGACGGTGACGGTGCTGGTTTA
OM45 pKT Tag R	1859	ATGTTATGCGGGAACCAACCCTTTACAATTAGCTATCTAATCGATGAATTCGAGCTCG
OAC1 pKT Tag F	1861	ACTAGTTTATTCGATAGAGTCGAGAGTTTTAGGCCATAATGGTGACGGTGCTGGTTTA
OAC1 pKT Tag R	1862	CAATGAATGAAACTTCAAACCTCGGAGTTTGTTATGGGAATCGATGAATTCGAGCTCG
OAC1 Longtine Tag F	2523	ACTAGTTTATTCGATAGAGTCGAGAGTTTTAGGCCATAATCGGATCCCCGGGTTAATTAA
OAC1 Longtine Tag R	2524	CAATGAATGAAACTTCAAACCTCGGAGTTTGTTATGGGAAGAATTCGAGCTCGTTTAAAC
ALO1 Longtine Tag F	2525	TATCATAAATGGTATTATAGATCCTAGTGAGTTGTCCGACCGGATCCCCGGGTTAATTAA
ALO1 Longtine Tag R	2526	TTTTTTAGTAAAATATAGAGATTATTGAGACAAAAAGAGAGAATTCGAGCTCGTTTAAAC
SEC61 pKT Tag F	2836	GTTTACTAAGAACCTCGTTCCAGGATTTTCTGATTTGATGGGTGACGGTGCTGGTTTA
SEC61 pKT Tag R	2837	GCGATTTTTTTTTTCTTTGGATATTATTTTCATTTTATATTCGATGAATTCGAGCTCG
TUF1 pKT Tag F	2838	AAGAACTGTTGGTACCGGTCTAATCACACGTATTATTGAAGGTGACGGTGCTGGTTTA
TUF1 pKT Tag R	2839	ACAGAATATATAGAAATATACTCCAGTTGCATCAATAAGTTCGATGAATTCGAGCTCG
PUT1 pKT Tag F	2840	CAAGGCCATAGCAAAGTCGATTCCAAAAAGAGTAGGCCTAGGTGACGGTGCTGGTTTA
PUT1 pKT Tag R	2841	TTGGTTTGTCTTTGAAATTGGAGTATATATTATAGTCCTCTCGATGAATTCGAGCTCG
OXA1 pKT Tag F	3110	CAAAATTGTTCACAAATCAAACTTCATTAATAACAAAAAAGGTGACGGTGCTGGTTTA
OXA1 pKT Tag R	3111	TTTATATTTTTATATTTACAGAGAGATATAGAGCCTTTATTCGATGAATTCGAGCTCG
HSP104 pKT Tag F	3207	CGATAATGAGGACAGTATGGAAATTGATGATGACCTAGATGGTGACGGTGCTGGTTTA
HSP104 pKT Tag R	3208	ATTCTTGTTCGAAAGTTTTTAAAAATCACACTATATTAAATCGATGAATTCGAGCTCG
GET3 Longtine Tag F	3392	TACTGATGGCAAAGTCATTTATGAGTTAGAAGATAAGGAACGGATCCCCGGGTTAATTAA
GET3 Longtine Tag R	3393	TTATATGTCGTATGTATCTATTTATGGTATTCAGGGGCTTTCATCGATGAATTCGAGCTC
GET3 Longtine Tag Chk F	3394	TTATGGGCGCAGGTAATGTCGATATCTCTG
GET3 Longtine Tag Chk R	3395	TTGGTCGTCATTTTGCTGAG
GET3 pKT Tag F	3396	TACTGATGGCAAAGTCATTTATGAGTTAGAAGATAAGGAAGGTGACGGTGCTGGTTTA
GET3 pKT Tag R	3397	TTATATGTCGTATGTATCTATTTATGGTATTCAGGGGCTTTCGATGAATTCGAGCTCG
DIC1 pKT Tag F	3598	TTGAAAAAACATAGGGTTGGCATGCCAAAGGAAGACAAGGGTGACGGTGCTGGTTTA
DIC1 pKT Tag R	3599	TGCTATGTATCTTTATGTTTATATGTATATAAATCTGCATCGATGAATTCGAGCTCG
HSP42 pKT Tag F	3709	ATTGGAGTTTGAAGAAAATCCCAACCCTACGGTAGAAAATGGTGACGGTGCTGGTTTA
HSP42 pKT Tag R	3710	AATATAAATGTATGTATGTGTGTATAAACAGATACGATATTCGATGAATTCGAGCTCG
SEC61 Longtine Tag F	4145	GTTTACTAAGAACCTCGTTCCAGGATTTTCTGATTTGATGCGGATCCCCGGGTTAATTAA
SEC61 Longtine Tag R	4146	GCGATTTTTTTTTTCTTTGGATATTATTTTCATTTTATATGAATTCGAGCTCGTTTAAAC
KO Primers
TOM71 KO F	1185	ATCTCTACATACTTGTATATACCGAACATAAGAAGCTCTTAGATTGTACTGAGAGTGCAC
TOM71 KO R	1186	TAACTAAAAGTATATATTTGACCAATACCTGACATATCTTCTGTGCGGTATTTCACACCG
TOM71 KO Chk F	1187	ACGACCCGGAGAACCCGGTCAATAAGTATA
GET1 KO F	2842	GCAATCCTTGAACTACGTCTAGTTGATTGAAATAGGAGAAAGATTGTACTGAGAGTGCAC
GET1 KO R	2843	TACATAAACATATTATATATACGTACATAATGTAATAACACTGTGCGGTATTTCACACCG
GET1 KO Chk F	2844	GTAGTGGGGTACCTCTTGGGATAACGAGGT
GET2 KO F	2845	CTTCCATGTTTGTAGCATCAGCAACGTAGCTCTAGGAAATAGATTGTACTGAGAGTGCAC
GET2 KO R	2846	TTATGAGAACAATGTATTATATTACTGAACTATCTAGAATCTGTGCGGTATTTCACACCG
GET2 KO Chk F	2847	AAGATGTGGGCTGCAGAATTGGACGATATG
GET3 KO F	2848	AAACGTACGACAAGAACAAGAAGATCATCACATTGTAATTAGATTGTACTGAGAGTGCAC
GET3 KO R	2849	TTATATGTCGTATGTATCTATTTATGGTATTCAGGGGCTTCTGTGCGGTATTTCACACCG
GET3 KO Chk F	2850	TCAGATCCTATAGAGCCTGTGGCACTGCTA
GET4 KO F	2851	AGTAAACATCATAAAGGGACATAAATAATAATAACAAGCTAGATTGTACTGAGAGTGCAC
GET4 KO R	2852	CGCAAACATATTTATCTATTCCTTCGCAAATATGCTCTTTCTGTGCGGTATTTCACACCG
GET4 KO Chk F	2853	TTGTCTTCTTGCAACAACTTATGAGCTAGC
GET5 KO F	2854	ATAAACTAGCGAAGAATAATAACTTTATACAAAATTAATCAGATTGTACTGAGAGTGCAC
GET5 KO R	2855	GTGTAAAATAACAAGTATGTACGTACTAACTATACTAATCCTGTGCGGTATTTCACACCG
GET5 KO Chk F	2856	GTCTTCGGAACCGAGGTCTTCGTAGAATGA
SEC72 KO F	2857	AACTTGCGTTAAAGGCATACCAAAGCAAGCTTATTCAACCAGATTGTACTGAGAGTGCAC
SEC72 KO R	2858	ACATATCAAGAAAAGGCTAAAATATCTTCGGTTATGCACCCTGTGCGGTATTTCACACCG
SEC72 KO Chk F	2859	AGAAGTCCAAGTCGATGAACAATTGATGCA
SGT2 KO F	2860	CTGACCAAGTGATATCTTATTAATACAAATCTACTGTACGAGATTGTACTGAGAGTGCAC
SGT2 KO R	2861	CTACATAACATGTATTGCATTAAAGGCTTATTTCAGTCCACTGTGCGGTATTTCACACCG
SGT2 KO Chk F	2862	GTCTGGCTACGAACCAGAAGATTCCAGGTT
GET1 KO Chk R	2863	GGAGGACATTAAGAATACTGGAG
GET2 KO Chk R	2864	GTACTGACATCCACACTCG
GET3 KO Chk R	2865	GAGTCAGTTACATCACCAGAG
GET4 KO Chk R	2866	GATTACTTCTTCTGCACAC
GET5 KO Chk R	2867	ATCGCGGTAGAGAGTATGTG
SEC72 KO Chk R	2868	CACGAGTAATGAATGGTCTG
SGT2 KO Chk R	2869	CTGCTTACTCAACTGTCTTACGC
SND2 KO F	2939	GAAGACACCAAAGGCAGTGGTCTAAGTTTGTGTTGGTAGAAGATTGTACTGAGAGTGCAC
SND2 KO R	2940	TAGAAAGCAAAAAATTTCAAAAACGTTTGAAAAGCTTTGTCTGTGCGGTATTTCACACCG
SND2 KO Chk F	2941	AGTATGAGGATGCCATGATGAATACAACCA
SND2 KO Chk R	2942	GGTACAATGTTGGCAGGAC
EMC2 KO F	2951	ATTGGAACGGAGAAAATTATAGAAAGCAGTAGATAAAACAAGATTGTACTGAGAGTGCAC
EMC2 KO R	2952	TCTCACCCTATCTTTTTTTTTCTTCTAATTTTGGCTCCGTCTGTGCGGTATTTCACACCG
EMC2 KO Chk F	2953	CAAGCTTGGCCATTGCCTGATACGGAATAA
EMC2 KO Chk R	2954	CACGCTTACAACAACCTCAG
DJP1 KO F	3112	AAGTGTTTCTTGCGGCCAGAAGGGGCATTATACAAAAGATAGATTGTACTGAGAGTGCAC
DJP1 KO R	3113	AATTTTTGAATTTTTAATATACAAGAGATGATTGCTAACTCTGTGCGGTATTTCACACCG
DJP1 KO Chk F	3114	AAGCCATAAGTGAGGAATCTCTGTCCCCAT
DJP1 KO Chk R	3115	CTACAGGGACTCCATATTCAG
HSP104 KO F	3210	AAAGAAATCAACTACACGTACCATAAAATATACAGAATATAGATTGTACTGAGAGTGCAC
HSP104 KO R	3211	ATTCTTGTTCGAAAGTTTTTAAAAATCACACTATATTAAACTGTGCGGTATTTCACACCG
HSP104 KO Chk F	3212	ACATATTAACATTGAACCCTCCATCGTGGT
HSP104 KO Chk R	3213	GTTATCAACGCCATATGTCC
TOM70 KO F	3318	GAAGTGAAATTACAGCTCACATCTAGGTTCTCAATTGCCAAGATTGTACTGAGAGTGCAC
TOM70 KO R	3319	TTTGTCTTCTCCTAAAAGTTTTTAAGTTTATGTTTACTGTCTGTGCGGTATTTCACACCG
TOM70 KO Chk F	3320	TTATGCTCGTCTCACTCATCTCATCGGTAC
TOM70 KO Chk R	3321	TAATGATCTATGGGACCAGCC
HSP42 KO F	3554	CCATATCCCACACAAATTAAGATCATACCAAGCCGAAGCAAGATTGTACTGAGAGTGCAC
HSP42 KO R	3555	AATATAAATGTATGTATGTGTGTATAAACAGATACGATATCTGTGCGGTATTTCACACCG
HSP42 KO Chk F	3556	ATAGCAAGAGATGGAATGGTAATGCTTGGC
HSP42 KO Chk R	3557	CTCTTCAGAAGCAATGGGAGC
TOM71 KO Chk R	3558	GAGGAAGAGCCATTAGGTGTGC
